# Supplementary material
Source: publisher figshare collection journal article supplement (https://karger.figshare.com/ndownloader/files/18018011)
Supplement: Supplementary file 1 [file 18018011]

Supplement Table 2. Details of thyroid disease in patients with alopecia areata and controls (n).

| **Study** | **Thyroid disease** | | **Thyroid antibody positive** | | | | | | | | **Hyperthyroidism** | | **Hypothyroidism** | |
| --- | --- | --- | --- | --- | --- | --- | --- | --- | --- | --- | --- | --- | --- | --- |
| **TG antibody** | | **TPO antibody** | | **TM antibody** | | **Any antibody** | |
| **Case** | **Control** | **Case** | **Control** | **Case** | **Control** | **Case** | **Control** | **Case** | **Control** | **Case** | **Control** | **Case** | **Control** |
| Friedmann PS | 26 | 207 | 9 | 57 |  |  | 20 | 140 | 26 | 207 |  |  |  |  |
| Al-Khawajah M | 5 | 2 | 2 | 1 |  |  | 3 | 2 | 5 | 2 | 1 | 0 |  |  |
| Puavilai S | 7 | 5 |  |  |  |  | 7 | 5 | 7 | 5 |  |  |  |  |
| Kuamr B | 8 | 5 | 3 | 3 |  |  | 8 | 5 | 8 | 5 |  |  |  |  |
| Sharma VK | 8 | 1 |  |  |  |  |  |  |  |  |  |  |  |  |
| Zhang X | 23 | 1 | 23 | 1 |  |  | 22 | 1 | 23 | 1 |  |  |  |  |
| Thomas EA | 13 | 4 |  |  |  |  |  |  | 13 | 4 | 2 | 2 | 10 | 2 |
| Kasumagic-Halilovic E | 18 | 1 |  |  |  |  |  |  | 18 | 1 |  |  |  |  |
| Fang J | 23 | 3 | 23 | 2 |  |  | 22 | 2 | 23 | 3 |  |  |  |  |
| Kasumagic-Halilovic E | 14 | 1 | 14 | 1 |  |  |  |  | 14 | 1 |  |  |  |  |
| Bakry OA | 24 | 0 | 23 | 0 | 24 | 0 |  |  | 24 | 0 |  |  | 8 | 0 |
| Miller R | 110 | 13 |  |  |  |  |  |  |  |  |  |  |  |  |
| He L | 25 | 7 |  |  | 25 | 7 |  |  | 25 | 7 |  |  |  |  |
| Bin S | 27 | 2 |  |  | 12 | 2 |  |  | 27 | 2 |  |  |  |  |
| Ghaffari J | 9 | 14 |  |  |  |  |  |  |  |  | 1 | 2 | 8 | 12 |
| He H | 18 | 3 | 9 | 2 | 18 | 3 |  |  | 18 | 3 |  |  |  |  |
| Wang H | 54 | 25 | 22 | 14 | 38 | 17 |  |  | 44 | 22 |  |  |  |  |
